# Supplementary material for: Text mining of online job advertisements to identify direct discrimination during job hunting process: A case study in Indonesia
Source: PubMed Central journal article supplement (PMC7272088; doi:10.1371/journal.pone.0233746), 2020-06-04
Supplement: pone.0233746.s001.pdf [file pone.0233746.s001.pdf]

Job Advertisements Categories Dictionary (JACD)

| 1. Manager                                                                                        | 2. Professionals                                                                           | 3. Technicians and associate professionals                                                                   | 4. Clerical support workers                                                                                    | 5. Service and sales workers                                                          | 6. Skilled agricultural, forestry and fishery workers                                                                                                                                            | 7. Craft and related trades workers                                                   | 8. Plant and machine operators, and assemblers                                     | 9. Elementary occupations                                                                    | 10. Armed forces occupations       | 11. Other                            |
|---------------------------------------------------------------------------------------------------|--------------------------------------------------------------------------------------------|--------------------------------------------------------------------------------------------------------------|----------------------------------------------------------------------------------------------------------------|---------------------------------------------------------------------------------------|--------------------------------------------------------------------------------------------------------------------------------------------------------------------------------------------------|---------------------------------------------------------------------------------------|------------------------------------------------------------------------------------|----------------------------------------------------------------------------------------------|------------------------------------|--------------------------------------|
| manager<br>manajer<br>kepala                                                                      | ahli<br>pakar<br>expert                                                                    | asisten*<br>ass*<br>asisten*                                                                                 | admin<br>adm<br>data entry                                                                                     | sales<br>salesman<br>telesales                                                        | petani<br>pertanian<br>peternak                                                                                                                                                                  | produksi<br>production<br>pekerja                                                     | operator<br>opeartor<br>mekanik                                                    | ob<br>og<br>housemaid                                                                        | taruna<br>taruni<br>polisi         | magang*<br>freelance*<br>freelancer* |
| kabag                                                                                             | professional                                                                               | executive assistant<br>executive                                                                             | adminitrasi                                                                                                    | salesgirl                                                                             | nelayan                                                                                                                                                                                          | pengecatan                                                                            | mechanic                                                                           | plrt                                                                                         | tentara                            | free lancer*                         |
| hrm<br>mpr<br>dpr<br>dprd<br>dprd<br>pejabat<br>direktur<br>chief                                 | professionals<br>dokter<br>medis<br>dentist<br>bidan<br>paramedis<br>psikolog<br>psikiater | assisstant<br>fieldd assistant<br>lab tech<br>ass manager<br>ga<br>assistent*<br>assistent manager<br>leader | entry data<br>input data<br>mengetik<br>administrasi<br>aministrasi<br>sekretaris<br>sekretarias<br>sekertaris | salesperson<br>agen<br>agency<br>steward<br>waitre<br>waiters<br>waitres<br>pramugari | pemburu<br>penangkap<br>agronomi<br>butchee<br>butcher<br>penyadap karet<br>penghasil susu<br>pemiak anjing<br>pengumpul<br>subsisten<br>tukang kebun<br>tukang taman<br>supervisor<br>pertanian | pembelah<br>pemotong<br>piping<br>pemecah<br>pemahat<br>tukang<br>pembuat<br>perancah | driver<br>tabber<br>perakit<br>bogger<br>mechanical<br>dragline<br>perakit<br>awak | prt<br>pembersih<br>buruh<br>packer<br>cheker<br>pemetik<br>penyortir<br>porter              | tni<br>polri<br>tantama<br>bintara | part time*<br>permagangan*           |
| cfo<br>ceo<br>rektor                                                                              | guru<br>pendidik<br>teacher                                                                | pelaksana<br>canvasser<br>canvaser                                                                           | secretary<br>pembukuan<br>panitera                                                                             | waitress<br>barista<br>marketing                                                      |                                                                                                                                                                                                  | pemasang<br>pengecat<br>setter                                                        | masinis<br>pengemudi<br>sopir                                                      | kuli<br>pesuruh<br>pengantar                                                                 |                                    |                                      |
| dekan<br>dean<br>rector<br>director<br>head                                                       | dosen<br>lecturer<br>pengajar<br>artist<br>artis                                           | teknik<br>tehnisi<br>teknisi<br>kanvaser<br>ppic                                                             | transkripsionis<br>stenografer<br>kasir<br>cashiers<br>cashier                                                 | cmo<br>representatif<br>representative<br>pemasaran<br>penjualan                      |                                                                                                                                                                                                  | pembersih<br>printing<br>patterner<br>pelebur<br>pertenunan                           | supir<br>boatswain<br>pekerja tambang<br>juru mudi<br>juru minyak                  | delivery<br>pemulung<br>stuffing person<br>pengepul<br>kurir                                 |                                    |                                      |
| legislator                                                                                        | animator                                                                                   | technical                                                                                                    | teller                                                                                                         | pramusaji                                                                             |                                                                                                                                                                                                  | carpenter                                                                             | operator produksi<br>production                                                    | serabutan                                                                                    |                                    |                                      |
| principal                                                                                         | geologist                                                                                  | teknisi                                                                                                      | staf field                                                                                                     | waitress                                                                              |                                                                                                                                                                                                  | penyambung                                                                            | operator<br>staff treatment                                                        | helper                                                                                       |                                    |                                      |
| governor<br>pemimpin<br>president<br>project builder<br>chief executive<br>promotion<br>executive | ilustrator<br>illustrator<br>seniman<br>perawat<br>nurse                                   | technician<br>dekorator<br>herbalist<br>dukun<br>staff                                                       | inventori<br>inventory<br>kolektor<br>penagihan<br>colector                                                    | security<br>satpam<br>guard<br>pengamanan<br>lifeguard                                |                                                                                                                                                                                                  | pandai<br>pemoles<br>pengasah<br>penajam<br>penyetel                                  | tangki<br>roof botler<br>opt mesin<br>operator mesin<br>mechanic staff             | marker<br>bellboy<br>kernet<br>juru bantu<br>general worker                                  |                                    |                                      |
| vice president                                                                                    | accouting                                                                                  | staf                                                                                                         | collector                                                                                                      | satpam                                                                                |                                                                                                                                                                                                  | penyetem                                                                              | pekerja penggalian                                                                 | tenaga bangunan<br>asisten operator<br>mesin                                                 |                                    |                                      |
| ka bag                                                                                            | accounting                                                                                 | teknisi                                                                                                      | bandar                                                                                                         | shopkeeper                                                                            |                                                                                                                                                                                                  | penggosok                                                                             | tenaga grader                                                                      |                                                                                              |                                    |                                      |
| ka bag                                                                                            | accountant                                                                                 | elektromedis                                                                                                 | rentenir                                                                                                       | brandcomm                                                                             |                                                                                                                                                                                                  | pengukir                                                                              | machinery spindle<br>pekerja                                                       | tenaga perkebunan                                                                            |                                    |                                      |
| head of<br>ka'sbag<br>ka bag kantor                                                               | arsitek<br>arsitektur<br>it<br>ti<br>drone specilaist                                      | elektromedik<br>biomedika<br>medical record<br>koordinator<br>superintendent                                 | front desk<br>inkaso<br>kolektor<br>collector<br>desk colection                                                | massanger<br>markeeting<br>capster<br>instruktur<br>marketer                          |                                                                                                                                                                                                  | penjahit<br>pengetsa<br>artwork<br>garment<br>sourcing                                | pengeboran<br>kepala kelasi<br>anak buah<br>juru pemroses<br>juru Vulkanisir       | cleaning service<br>domestic helper<br>oyster shucker<br>tenaga packing<br>tenaga kebersihan |                                    |                                      |

| 1. Manager | 2. Professionals                                                                                                                                                                                                                              | 3. Technicians and associate professionals                                                                                       | 4. Clerical support workers                                                                                                                                                               | 5. Service and sales workers                                                                                                                         | 6. Skilled agricultural, forestry and fishery workers | 7. Craft and related trades workers                                                                                                                     | 8. Plant and machine operators, and assemblers | 9. Elementary occupations                                                                                                                                                                                     | 10. Armed forces occupations | 11. Other |
|------------|-----------------------------------------------------------------------------------------------------------------------------------------------------------------------------------------------------------------------------------------------|----------------------------------------------------------------------------------------------------------------------------------|-------------------------------------------------------------------------------------------------------------------------------------------------------------------------------------------|------------------------------------------------------------------------------------------------------------------------------------------------------|-------------------------------------------------------|---------------------------------------------------------------------------------------------------------------------------------------------------------|------------------------------------------------|---------------------------------------------------------------------------------------------------------------------------------------------------------------------------------------------------------------|------------------------------|-----------|
|            | hrd<br>radiolog                                                                                                                                                                                                                               | coordinator<br>radiografer                                                                                                       | desk collection<br>executor                                                                                                                                                               | broker<br>pialang                                                                                                                                    |                                                       | procurement<br>pelapis                                                                                                                                  | operator mesin<br>juri api                     | office boy<br>office girl                                                                                                                                                                                     |                              |           |
|            | apoteker<br>farmakolog                                                                                                                                                                                                                        | radiographer<br>radiographer                                                                                                     | eksekutor<br>aro                                                                                                                                                                          | penaksir emas<br>hairstylist                                                                                                                         |                                                       | pelukis<br>pemintalan                                                                                                                                   | cutting handernife<br>makanik utility          | pekerja sampah<br>pemetik buah                                                                                                                                                                                |                              |           |
|            | botanist<br>zoologist<br>chemist                                                                                                                                                                                                              | korlap<br>hse staff<br>staf hse                                                                                                  | mantri<br>checker<br>ticketing staff<br>administration                                                                                                                                    | beauty therapis<br>beauty advisor<br>beautician                                                                                                      |                                                       | penjilid<br>montir<br>pembangun                                                                                                                         |                                                | pedagang asongan<br>tukang parkir<br>asisten rumah                                                                                                                                                            |                              |           |
|            | stacionian<br>fisioterapis<br>acounting<br>biologist<br>bagian keuangan<br>industrial<br>engineering<br>penasihat<br>advisor<br>adviser<br>scientist<br>konsultan<br>consultant<br>counsultant<br>researcher<br>research<br>tentor<br>auditor | staff keuangan<br>staf operasional<br>ic staff<br>chiropractor<br>buyer                                                          | executive<br>ticketing officer<br>penagih<br>resepsionis<br>reseptionis                                                                                                                   | beautyician<br>terapis<br>therapis spa<br>spa theraphis                                                                                              |                                                       | pemasang<br>penyembelih<br>riggers<br>perkayuan<br>pertukangan                                                                                          |                                                | pantry<br>plrt<br>p l t<br>pembantu rumah<br>tenaga cuci                                                                                                                                                      |                              |           |
|            | microbiolog<br>trainner                                                                                                                                                                                                                       | purchasing<br>osteopath<br>sanitarian<br>panitera<br>ekspor<br>impor<br>exim<br>export<br>import<br>pengawas<br>estimator<br>asm | recepcionista<br>receptionis<br>reception<br>receptionist<br>receptionist<br>receptionist<br>receptionist<br>frontliner<br>frontliners<br>front liner<br>front line<br>recepisionis<br>cs | therapist<br>phlebotomist<br>housekeepers<br>housekeeping<br>housekeeper<br>butler<br>waiter<br>penjaga<br>pengawal<br>watchman<br>watchwoman<br>spg |                                                       | product technician<br>pengawet<br>pengekstrak<br>cutter<br>cutting<br>finishing<br>finishing<br>finshing<br>penilai<br>pengolah<br>penyetel<br>penyulam |                                                | staff lectra pola<br>juru bersih<br>tenaga setrika<br>loper koran<br>pelinting rokok<br>pengantar koran<br>penyemir sepatu<br>office boy<br>general workers<br>general worker<br>clnng service<br>tenaga spon |                              |           |
|            | audit<br>planner<br>surveyor<br>survey                                                                                                                                                                                                        | drafter<br>draftsman<br>furniture<br>fotografer<br>fotografer<br>drafter<br>draftman                                             | customer relations<br>cso                                                                                                                                                                 | spb<br>telemarketing                                                                                                                                 |                                                       | instalation<br>penguji                                                                                                                                  |                                                | office girl<br>doorman                                                                                                                                                                                        |                              |           |
|            | srveyor<br>desainer<br>trainer<br>recruiter                                                                                                                                                                                                   | cook<br>foreman<br>forelady<br>ie staff<br>industrial                                                                            | cs o<br>organizer<br>compliance<br>pengantar surat<br>office                                                                                                                              | petugas logistik<br>entrance gate<br>field officer<br>promotion                                                                                      |                                                       | penyamak<br>pembasmi<br>staff teknik<br>sewing                                                                                                          |                                                | bongkar muat<br>staff pola<br>cleaning service<br>clnng service                                                                                                                                               |                              |           |
|            | recruitment<br>recruitment<br>specialist<br>perencana                                                                                                                                                                                         | engineering staff<br>mandor<br>staff operasional                                                                                 | management<br>license officer<br>liceuse officer<br>reservation clerk                                                                                                                     | lending officer<br>promosi<br>counter<br>pramuniaga                                                                                                  |                                                       | spray<br>electricians<br>electrician<br>electrik                                                                                                        |                                                | tukang semir<br>tenaga bangunan<br>tukang sampah<br>tukang sapu<br>general workers<br>pabrik                                                                                                                  |                              |           |
|            |                                                                                                                                                                                                                                               |                                                                                                                                  | bagian umum                                                                                                                                                                               | sexton                                                                                                                                               |                                                       | listrik                                                                                                                                                 |                                                |                                                                                                                                                                                                               |                              |           |
|            |                                                                                                                                                                                                                                               |                                                                                                                                  | stock control<br>tukang pos                                                                                                                                                               | pelayan<br>md                                                                                                                                        |                                                       | elektrik<br>veneer                                                                                                                                      |                                                | krew kapal<br>tenaga gudang                                                                                                                                                                                   |                              |           |

| 1. Manager | 2. Professionals                                                                                                                                                                                                                                                                                                                                                                                                                         | 3. Technicians and associate professionals                                                                                                                                                                                                                                                                                                                                                                                                                                                                        | 4. Clerical support workers                                                                                                                                                                                                                                                                                                                                                                                                                                                                                                                                                                                                                                  | 5. Service and sales workers                                                                                                                                                                                                                                                                                                                                                                                                                                                                                                                                                         | 6. Skilled agricultural, forestry and fishery workers | 7. Craft and related trades workers | 8. Plant and machine operators, and assemblers                                                                                                                                                                                                                                                                                                                                                                                                                                                                                                                           | 9. Elementary occupations | 10. Armed forces occupations                                                                                                                                         | 11. Other |  |
|------------|------------------------------------------------------------------------------------------------------------------------------------------------------------------------------------------------------------------------------------------------------------------------------------------------------------------------------------------------------------------------------------------------------------------------------------------|-------------------------------------------------------------------------------------------------------------------------------------------------------------------------------------------------------------------------------------------------------------------------------------------------------------------------------------------------------------------------------------------------------------------------------------------------------------------------------------------------------------------|--------------------------------------------------------------------------------------------------------------------------------------------------------------------------------------------------------------------------------------------------------------------------------------------------------------------------------------------------------------------------------------------------------------------------------------------------------------------------------------------------------------------------------------------------------------------------------------------------------------------------------------------------------------|--------------------------------------------------------------------------------------------------------------------------------------------------------------------------------------------------------------------------------------------------------------------------------------------------------------------------------------------------------------------------------------------------------------------------------------------------------------------------------------------------------------------------------------------------------------------------------------|-------------------------------------------------------|-------------------------------------|--------------------------------------------------------------------------------------------------------------------------------------------------------------------------------------------------------------------------------------------------------------------------------------------------------------------------------------------------------------------------------------------------------------------------------------------------------------------------------------------------------------------------------------------------------------------------|---------------------------|----------------------------------------------------------------------------------------------------------------------------------------------------------------------|-----------|--|
|            | fisioterapi<br>orthoptist<br>instruktur<br>inspektur<br><br>konselor<br><br>tutor<br>educator<br>akuntan<br><br>pengembang<br>development<br><br>developer<br><br>programer<br><br>programmer<br>administrator<br>webmaster<br><br>analisis<br><br>analyst<br>analisis<br>spesialis<br><br>analisis data<br><br>pustakawan<br><br>sdm<br><br>librarian<br><br>arsiparis<br>kurator<br>penulis<br><br>wartawan<br>journalist<br>pengacara | invoice<br>pajak<br>staff pajak<br>r d staff<br><br>tax<br><br>pmo<br>laboran<br>maintainance<br><br>maaintenance<br><br>maintanace<br><br>maintanace<br><br>support<br><br>shipping<br>eksim<br>procedur officer<br><br>personal assistant<br><br>personal assistan<br>tenaga teknis<br><br>marine repair<br><br>assistant agronomy<br><br>quality control<br><br>qualinty control<br><br>quality controle<br>quaity contrl<br>quality assurance<br>assistant<br><br>management<br>koresponden<br>proses control | laboratory<br>information<br>services<br>customer service<br>costumer service<br>customer care<br><br>customer servis<br>customer relation<br>officer<br>helpdesk<br>help desk<br><br>costemer service<br>penerimaan<br>service<br><br>tallyman<br>penerimaan<br>service<br><br>pengelolaan data<br><br>staf compliance<br>field collection<br>collection<br><br>collection officer<br>media remainder<br>sistem<br>storage gudang<br>store inventory<br><br>cinema crew<br><br>front office<br>payment point<br>staff<br><br>operator telpon<br>officer data<br>service<br>call center<br>hotline officer<br><br>input data<br>entri data<br>petugas konter | menchandiser<br>merchandiser<br>merchandising<br>bartender<br>pemadam<br>kebakaran<br><br>tele caller<br>insurance agent<br>mitra usaha<br><br>supervisor selling<br><br>staff konsultan<br>member relations<br>officer<br><br>mro<br><br>service attendant<br>customer contact<br>spa terapi<br><br>driving instructors<br><br>pool attendants<br>house keeping<br>guest service<br><br>penjaga keamanan<br><br>staff promosi<br><br>hair stylist<br><br>penjaga pantai<br><br>account officer<br>tenaga penjual<br>tenaga market<br><br>credit officer<br>accoun officer<br>trader |                                                       |                                     | elektronika<br>tukang batu<br>pandai logam<br>pandai besi<br><br>garber garments<br><br>gerber<br>art work<br>reparasi sofa<br><br>tukang reparasi<br><br>teknisi bengkel<br><br>teknisi computer<br><br>maintenance listrik<br><br>supervisor amplas<br>scrap staff<br>spv elektrikal<br><br>supervisor elektrik<br><br>spv elektro<br>tenaga sablon<br>bread baker<br><br>baker<br><br>pattern maker<br><br>supevisor produksi<br>supervisor<br>produksi<br>supervisor<br>production<br>spv produksi<br>tenaga jok<br><br>pembuat jok<br>pembuat kursi<br>tenaga jahit |                           | tenaga kerja<br>bangunan<br>abk kapal<br>crew kapal<br>penjaga parkir<br><br>kuli<br><br>ffice boy<br>bell boy<br>bell service<br><br>door girl<br><br>docking kapal |           |  |













| 1. Manager | 2. Professionals                                                                                                                                                                                                                                                                                                                                                                                                                                                                              | 3. Technicians and associate professionals                                                                                                                                                                                                                                                                    | 4. Clerical support workers | 5. Service and sales workers | 6. Skilled agricultural, forestry and fishery workers | 7. Craft and related trades workers | 8. Plant and machine operators, and assemblers | 9. Elementary occupations | 10. Armed forces occupations | 11. Other |
|------------|-----------------------------------------------------------------------------------------------------------------------------------------------------------------------------------------------------------------------------------------------------------------------------------------------------------------------------------------------------------------------------------------------------------------------------------------------------------------------------------------------|---------------------------------------------------------------------------------------------------------------------------------------------------------------------------------------------------------------------------------------------------------------------------------------------------------------|-----------------------------|------------------------------|-------------------------------------------------------|-------------------------------------|------------------------------------------------|---------------------------|------------------------------|-----------|
|            | management sistem sumber daya manusia<br>humas profesional business consultant<br>product specialist<br>clinical specialist environment officer general affair visual artis data processing<br>problem solving<br>industrial relation specialist statistic analyst<br>analisis lab management information system<br>web design<br>web programming teknik sipil finansial consultan mesin analist human resources officer research team praktisi medis petugas medis petugas klinis consultant | project supervisor<br>site supervisor transportation supervisor product plaining control<br>petugas sterilisasi<br>brand acquisition<br>sourcing sales supervisor salacs supervisor ka shift sourcing raw material<br>engineering crew ka regu<br>supervisor gudang<br>remedial officer supervisor restaurant |                             |                              |                                                       |                                     |                                                |                           |                              |           |
